# Supplementary material
Source: PubMed Central journal article supplement (PMC4084916)
Supplement: NIHMS586740-supplement-01.pdf [file NIHMS586740-supplement-01.pdf]

## Online Appendix

The sample *Mplus* syntax illustrates how to estimate a two –class shared parameter mixture model, including how to obtain aggregate point estimates and standard errors for the growth parameters.

```

TITLE: Appendix Code
DATA: file=yourdata.dat;
VARIABLE: names are id y0 y1 y2 y3 y4 y5 y6 y7 y8 y9
summary x0 x1; missing=.;
classes=class(2);          !Change if increasing or decreasing number of classes
ANALYSIS:
coverage=0;                !Allows missing data
starts=100 10;            !More random starts lead to more stable estimates (Hipp & Bauer, 2006)
type= mixture;
MODEL:
%OVERALL%
i s | y0@0 y1@1 y2@2 y3@3 y4@4 y5@5 y6@6 y7@7 y8@8 y9@9;
[y0-y9@0];
y0-y9(1)*;                !Freely estimate homogenous item error variances. They are fixed to equality.
                            This constraint may be relaxed. It is possible to add
                            residual correlations if necessary.
i* (wvarint);              !Save within-class intercept variance.
s* (wvarslp);              !Save within-class slope variance.
i with s* (wcov);         !Save within-class covariance.
[s*]; [i*];
[summary*];
i on x0 x1; s on x0 x1;
summary on x0 x1;
summary with i@0; summary with s @0;    !Conditional independence
[Class#1] (logit1);        !Add more class intercepts as number of classes
                            increases. Save information into "logit1" to calculate
                            class proportions using model constraints.

%Class#1%
[i] (a01);                !Class-specific fixed intercept. Save for model constraint.
[s] (a11);                !Class-specific fixed slope. Save for model constraint.
[summary];                !Missing data pattern varies by class
%Class#2%
[i] (a02);                !Class-specific fixed intercept. Save for model constraint.
[s] (a12);                !Class-specific fixed slope. Save for model constraint.
[summary];                !Missing data pattern varies by class
MODEL CONSTRAINT:
NEW(p1 p2 mba mbb );
p1 = exp(logit1)/(exp(logit1)+1);    !Compute class proportion. Add terms in denominator
                                      +(exp(logit2)... as number of classes increase.
p2 = 1-p1;                    !The last class proportion is 1- all other class
                                      proportions.
mba = (p1*a01 + p2*a02);        !Delta-method standard errors will be computed. Add
                                      more terms as number of classes increases.
mbb = (p1*a11 + p2*a12);        !Delta-method standard errors will be computed. Add
                                      more terms as number of classes increases.

```

$$va = wvarint + p1 * p2 * (a01 - a02) ** 2;$$

!Computing aggregate intercept variance. Add all possible between-class combinations as number of classes increases.

$$vb = wvarslp + p1 * p2 * (a11 - a12) ** 2;$$

!Computing aggregate slope variance. Add all possible between-class combinations as number of classes increases.

$$covab = wcov + p1 * p2 * (a01 - a02) * (a11 - a12);$$

!Computing aggregate intercept-slope covariance. Add terms as number of classes increases.
